# Supplementary material for: Alteration of Ethanol Reward by Prior Mephedrone Exposure: The Role of Age and Matrix Metalloproteinase-9 (MMP-9)
Source: MDPI journal article supplement (doi:10.3390/ijms23042122), 2022-02-14
Supplement: s1 [file s1]

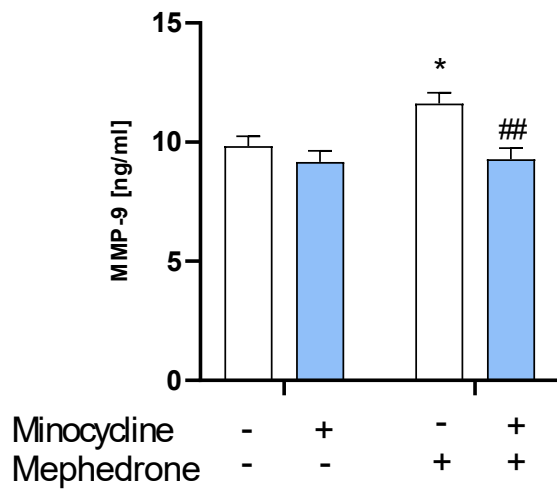

**Figure S1.** Influence of minocycline (45 mg/kg i.p.) pretreatment on the mephedrone (3 x 10 mg/kg/day x 7 days; PND30-36, n = 7/group) effect on MMP-9 expression in the vSTR of adult rats (PND79); \*p < 0.05 vs. 0.9 % NaCl; ##p < 0.01 vs. mephedrone.

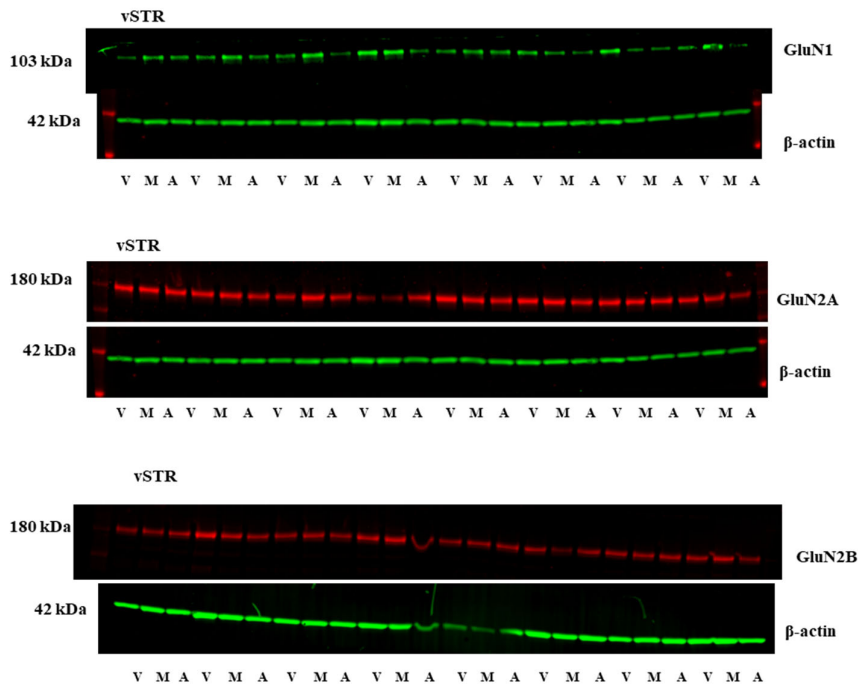

**Figure S2.** Corresponding membranes from Western blot analyses of NMDA receptor subunits and loading controls in the vSTR. V- vehicle, M- mephedrone, A- amphetamine (data not included in this paper). Control protein (β-actin) for GluN1 and GluN2A was the same.
